# Supplementary material
Source: publisher figshare collection journal article supplement (https://frontiersin.figshare.com/ndownloader/files/14392913)
Supplement: Supplementary file [file 14392913]

**Supp Table S2. Effect of different concentrations of RNAP III inhibitor on luciferase activity**

|                            | Luciferase<br>(Mean) | Luciferase<br>(STDEV) | Percentage |
|----------------------------|----------------------|-----------------------|------------|
| DMSO                       | 136272               | 48415                 | 100        |
| RNAP III In.<br>20 $\mu$ M | 113797               | 7901                  | 83.5       |
| RNAP III In.<br>40 $\mu$ M | 108003               | 41263                 | 79.2       |
| RNAP III In.<br>60 $\mu$ M | 103172               | 24315                 | 75.7       |
| RNAP III In.<br>80 $\mu$ M | 93141                | 16029                 | 68.3       |

HEK293T cells were transfected with a plasmid expressing pCMV-Luc for 16 h, after that the cells were treated with DMSO or different concentrations of the RNAP III inhibitor during 5 h, collected and processed for luciferase detection by luciferase reporter assay from Promega .
